# Supplementary material for: Polystyrene-supported N-methylthiourea: a convenient new reagent for the hydrogenolysis of bicyclic endoperoxides
Source: Royal Society of Chemistry journal article supplement (doi:10.1039/b508815a), 2005-01-01
Supplement: b508815a.pdf [file b508815a.pdf]

**Polystyrene-supported *N*-Methylthiourea: A Convenient New Reagent for the Hydrogenolysis of Bicyclic Endoperoxides**

Alan C. Spivey, Carles Giró Mañas, Inderjit Mann

**Supporting Information**

**Experimental:**

**General Directions:** All reactions were performed under anhydrous conditions and an atmosphere of nitrogen in flame-dried glassware. Yields refer to chromatographically and spectroscopically ( $^1\text{H}$  NMR) homogenous materials, unless otherwise indicated.

**Solvents and reagents:** All solvents were distilled before use. 'Petrol' refers to the fraction of light petroleum-ether boiling between 40 – 60°C. Commercial grade solvents used for flash chromatography were distilled before use. Anhydrous solvents were obtained as follows:  $\text{CH}_2\text{Cl}_2$  and  $\text{Et}_2\text{O}$  were distilled from sodium/benzophenone ketyl under nitrogen immediately prior to use. All chemicals were handled in accordance with COSHH regulations. All reagents were used as commercially supplied.  $\text{Ac}_2\text{O}$  was shaken with  $\text{P}_2\text{O}_5$ , separated and fractionally distilled from  $\text{K}_2\text{CO}_3$ .  $\text{Et}_3\text{N}$  was stirred over  $\text{CaH}_2$  under nitrogen for 24h, then distilled and stored over molecular sieves (4 Å) under nitrogen. **Chromatography:** Flash chromatography (FC) was carried out using Merck Kiesegel 60 F<sub>254</sub> (230-400 mesh) silica gel. Thin layer chromatography (TLC) was performed on Merck aluminium-backed plates pre-coated with silica (0.2 mm, 60 F<sub>254</sub>) which were visualised either by quenching of ultraviolet fluorescence ( $\lambda_{\text{max}} = 254$  and 366 nm) or by charring with 10%  $\text{KMnO}_4$  in 1M  $\text{H}_2\text{SO}_4$ . **Infra red spectra:** These were recorded as KBr discs on a Perkin-Elmer Paragon 1000 Fourier transform spectrometer. Only selected absorbances ( $\nu_{\text{max}}$ ) are reported.  **$^1\text{H}$  NMR spectra:** These were recorded at either 270, 300 or 400 MHz on Jeol 270GSX, Bruker DRX-300, or Bruker AMX-400 instruments respectively. Chemical shifts ( $\delta\text{H}$ ) are quoted in parts per million (ppm), referenced to the appropriate residual solvent peak. Coupling constants ( $J$ ) are reported to the nearest 0.5 Hz. The abbreviation *app* = 'apparent'.  **$^{13}\text{C}$  NMR spectra:** These were recorded at 100 MHz on a Bruker AMX-400 instrument. Chemical shifts ( $\delta\text{C}$ ) are quoted in ppm, referenced to the appropriate solvent peak. **Mass spectra:** Low resolution mass spectra ( $m/z$ ) were recorded on either a VG platform II or VG AutoSpec spectrometers, with only molecular ions ( $\text{M}^+$ ,  $\text{MH}^+$ ,  $\text{MNH}_4^+$ ) and major peaks being reported with intensities quoted as percentages of the

base peak. High Resolution Mass Spectrometry (HRMS) measurements are valid to  $\pm 5$  ppm. Microanalysis performed by Warwick Analytical Services Ltd., Coventry.

**Experimental Procedures:** The following general methods were applied

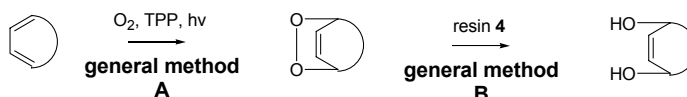

#### 4,4-Dimethyl-3,5,8,9-tetraoxatricyclo[5.2.2.0<sup>2,6</sup>]undec-10-ene (7)<sup>1</sup>

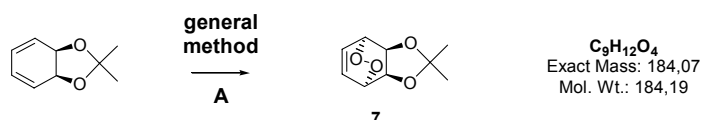

**General Method A:** To a stirred solution of *cis*-2,2-dimethyl-3a,7a-dihydrobenzo[1,3]dioxole<sup>2</sup> (0.30 g, 1.97 mmol) in CCl<sub>4</sub> (15 mL) was added tetraphenylporphyrin (TPP) (55 mg, 1.07 mmol) in CHCl<sub>3</sub> (5 mL). The resulting solution was irradiated with a 300 W tungsten filament lamp while bubbling oxygen through at 0 °C until all the diene had been consumed (by TLC, 2.5 h in this case). The reaction mixture was then concentrated *in vacuo* at RT, the resulting green residue dissolved in ice-cold hexane (5 mL), and activated charcoal (1.5 g) was added. The resulting black suspension was stirred for 10 min at 0 °C, filtered through a pad of Celite<sup>TM</sup> and the Celite<sup>TM</sup> washed with a further portion of ice-cold hexane (50 mL). The filtrate was concentrated *in vacuo* to give endoperoxide **7** as light brown needles (0.32 g, 88%). R<sub>f</sub> 0.25 (Et<sub>2</sub>O/pentane, 1:2); δ<sub>H</sub> (CDCl<sub>3</sub>, 300 MHz) 1.36 (3H, s, CH<sub>3</sub>), 1.38 (3H, s, CH<sub>3</sub>), 4.69 (2H, br s, H-2 and H-3), 4.81 (2H, br s, H-1 and H-4), 6.55 (2H, d, *J* 10.0, H-5 and H-6); *m/z* (Cl<sup>+</sup>) 202 (MNH<sub>4</sub><sup>+</sup>, 100%).

#### 2,3-Dioxabicyclo[2.2.2]oct-5-ene (8)<sup>3</sup>

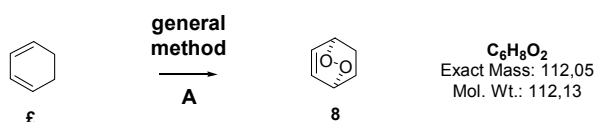

Using **general method A**, 1,3-cyclohexadiene (0.25 g, 3.12 mmol) and TPP (6 mg) after 2 h gave off-white crystals of endoperoxide **8** (238 mg, 68 %). R<sub>f</sub> 0.3 (Et<sub>2</sub>O/pentane, 3:7); δ<sub>H</sub> (CDCl<sub>3</sub>, 300 MHz) 1.46 (2H, d, *J* 10.0, CH<sub>2</sub>), 2.27 (2H, d, *J* 10.0, CH<sub>2</sub>), 4.63 (2H, br s, 2 × CHO), 6.70 (2H, dd, *J* 3.0, 3.0, CH=CH); *m/z* (Cl<sup>+</sup>) 130 (MNH<sub>4</sub><sup>+</sup>, 100%).

#### 6,7-Dioxabicyclo[3.2.2]non-8-ene (9)<sup>4</sup>

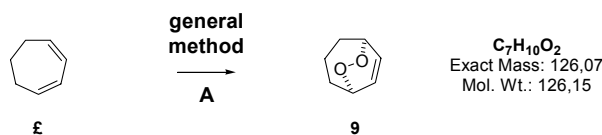

Using **general method A**, cycloheptadiene (0.25 g, 2.66 mmol) and TPP (6 mg) after 3 h gave endoperoxide **9** as a white solid (230 mg, 62%).  $R_f$  0.35 (Et<sub>2</sub>O/petrol, 3:7);  $\delta_H$  (CDCl<sub>3</sub>, 300 MHz) 1.23-1.42 (1H, CHH), 1.44-1.73 (1H, CHH), 1.87-2.06 (4H, 2 × CH<sub>2</sub>), 4.62-4.81 (2H, 2 × CHO), 6.21-6.41 (2H, CH=CH);  $m/z$  (CI<sup>+</sup>) 127 (MH<sup>+</sup>, 19%), 144 (MNH<sub>4</sub><sup>+</sup>, 100%).

### 6,7-Dioxabicyclo[3.2.2]nona-2,8-diene (**10**)<sup>5</sup>

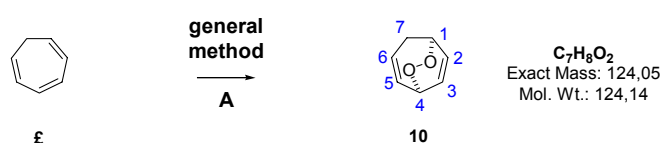

Using **general method A**, cycloheptatriene (1.00 g, 2.72 mmol) and TPP (66 mg) after 7 h and purification by FC (CH<sub>2</sub>Cl<sub>2</sub>/pentane, 1:1) at -50 °C gave the endoperoxide **10** as a white solid (543 mg, 45%).  $R_f$  0.75 (CH<sub>2</sub>Cl<sub>2</sub>);  $\delta_H$  (CDCl<sub>3</sub>, 300 MHz); 2.39 (1H, *app* dq, *J* 20.0, 2.0, H-7), 2.92 (1H, *app* dddd, *J* 20.0, 3.5, 3.0, 2.5, H-7), 4.67 (1H, *app* tq, *J* 7.0, 2.0, H-4), 4.78 (1H, *app* tquin, *J* 5.0, 1.5, H-1), 5.69 (1H, *app* tt, *J* 3.5, 1.5, H-5), 6.05 (1H, *app* dt, *J* 9.0, 2.0, H-6), 5.32 (1H, *app* dd, *J* 7.5, 1.0, H-3), 6.75 (1H, *app* t, *J* 8.5, H-2);  $m/z$  (CI<sup>+</sup>) 125 (MH<sup>+</sup>, 58%), 142 (MNH<sub>4</sub><sup>+</sup>, 100%).

### 9,10-Dioxatricyclo[6.6.2.0<sup>2,7</sup>]anthracene (**11**)<sup>6</sup>

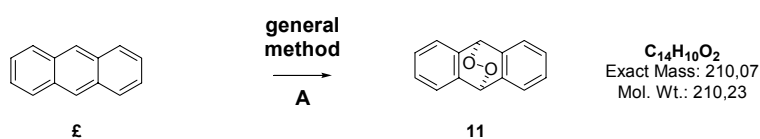

Using **general method A** (but omitting the decolourisation with activated charcoal and instead filtering through a plug of silica gel with pentane), anthracene (0.25 g, 1.40 mmol) and TPP (6 mg, 1 mol%) after 3 h gave endoperoxide **11** as a dark brown powder (280 mg, 92 %).  $R_f$  0.2 (pentane);  $\delta_H$  (CDCl<sub>3</sub>, 300 MHz) 5.98 (2H, br s, 2 × CHO), 7.21-7.35 (4H, ArCHs), 7.39-7.41 (4H, ArCHs);  $m/z$  (CI<sup>+</sup>) 211 (MH<sup>+</sup>, 56%), 228 (MNH<sub>4</sub><sup>+</sup>, 100%).

### 9-Methyl-9,10-dioxatricyclo[6.6.2.0<sup>2,7</sup>]anthracene (**12**)<sup>7</sup>

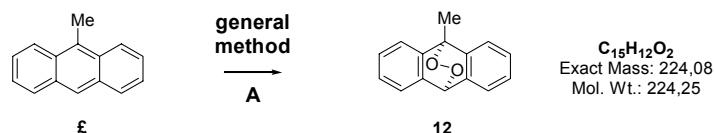

Using **general method A** (but omitting the decolourisation with activated charcoal and instead filtering through a plug of silica gel with pentane), 9-methyl anthracene (1.00 g, 5.20 mmol) and TPP (32 mg, 1 mol%) after 3.5 h gave endoperoxide **12** as a white crystalline solid (1.13 g, 95%).  $R_f$  0.3 (pentane);  $\delta_H$  ( $\text{CDCl}_3$ , 270 MHz) 2.14 (3H, s,  $\text{CH}_3$ ), 5.97 (1H, s, CH), 7.33-7.38 (4H, ArCHs), 7.42-7.51 (4H, ArCHs);  $m/z$  ( $\text{CI}^+$ ) 225 ( $\text{MH}^+$ , 56 %).

### 9,10-Dimethyl-9,10-dioxatricyclo[6.6.2.0<sup>2,7</sup>]anthracene (**13**)<sup>8</sup>

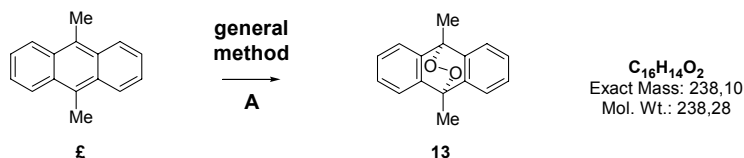

Using **general method A** (but omitting the decolourisation with activated charcoal and instead filtering through a plug of silica gel with pentane), 9,10-dimethyl anthracene (0.60 g, 2.90 mmol) and TPP (9 mg, 1 mol%) after 2.5 h gave endoperoxide **13** as a white crystalline solid (690 mg, 99 %).  $R_f$  0.3 (pentane);  $\delta_H$  ( $\text{CDCl}_3$ , 300 MHz) 2.23 (6H, s,  $2 \times \text{CH}_3$ ), 7.33-7.38 (4H, ArCHs), 7.41-7.45 (4H, ArCHs);  $m/z$  ( $\text{CI}^+$ ) 239 ( $\text{MH}^+$ , 100%).

### cis-(6-Methyl-3,6-dihydro-[1,2]dioxin-3-yl)methanol (**14**)<sup>9</sup>

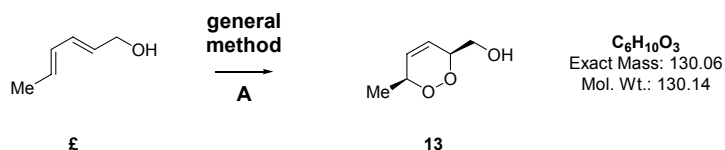

Using **general method A**, sorbic alcohol (0.50 g, 5.10 mmol) and TPP (10 mg, 1 mol%) after 4 h and purification by FC (Pet. $\text{Et}_2\text{O}/\text{Et}_2\text{O}$ , 2:1) gave endoperoxide **14** as a light brown mobile oil (185 mg, 30%).  $R_f$  0.35 ( $\text{Et}_2\text{O}$ );  $\delta_H$  ( $\text{CDCl}_3$ , 300 MHz) 1.13 (3H, d,  $J$  7.0,  $\text{CH}_3$ ), 3.17 (1H, br s, OH), 3.61 (1H, m, CHH), 3.78 (1H, t,  $J$  9.0, CHH), 4.38 (1H, m, CHO), 4.72 (1H, m,  $\text{CHCH}_3$ ), 5.80 (1H, ddd,  $J$  10.0, 3.5, 2.0,  $\text{CH}=\text{CH}$ ), 5.89 (1H, dt,  $J$  10.0, 2.0,  $\text{CH}=\text{CH}$ );  $m/z$  ( $\text{CI}^+$ ) 148 ( $\text{MNH}_4^+$ , 100%).

### Polystyrene-bound thiourea (**4**)

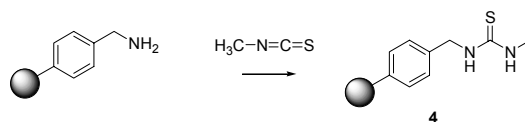

Aminomethylated polystyrene (5.00 g, 5.50 mmol, 1.1 g mol<sup>-1</sup>) was added to Et<sub>2</sub>O (30 mL) and allowed to swell for 20 min with vigorous stirring. Methylisothiocyanate (0.44 g, 5.60 mmol) was then added and the reaction mixture was refluxed for 4 h. After cooling to RT, the resin was filtered off, washed with Et<sub>2</sub>O (3 × 100 mL) and dried *in vacuo* for 2 d to give a free flowing pale yellow resin **4** (5.32g, 94%, 1.1 g mol<sup>-1</sup>).  $\nu_{\max}$  (KBr) 3463.6, 3249.5, 3.164.3, 1537.6, 1522.1, 1289.5 (C=S), 1045.2; Microanalysis: N, 2.9; S, 3.3 %.

**(4*R*,5*S*,6*R*)-4-*O*-Acetoxy-5,6-di-*O*-isopropylidencyclohex-2-ene-1-one (5)**<sup>10</sup>

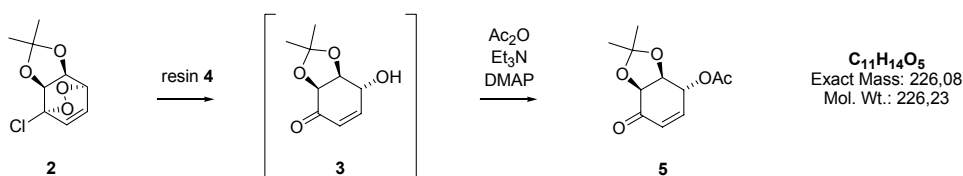

To a suspension of resin **4** (1.03 g, 1.03 mmol) in CH<sub>2</sub>Cl<sub>2</sub> (15 mL) at 0 °C was added a solution of 1-chloro-4-methyl-3,5,8,9-tetraoxa-tricyclo[5.2.2.0]undec-10-ene **2**<sup>11</sup> (0.15 g, 0.69 mmol) in CH<sub>2</sub>Cl<sub>2</sub> (5 mL) *via* a cannula. After stirring for 30 min the resin was filtered off and washed with CH<sub>2</sub>Cl<sub>2</sub> (3 × 30 mL). The filtrate was concentrated *in vacuo* to a volume of ~10 mL and a mixture of DMAP (8 mg, 0.07 mmol), Et<sub>3</sub>N (144 μL, 1.03 mmol) and Ac<sub>2</sub>O (97 μL, 0.96 mmol) in CH<sub>2</sub>Cl<sub>2</sub> (3 mL) was added at RT. After stirring for a further 20 min, the reaction mixture was quenched with NaHCO<sub>3</sub> (sat. aq., 5 mL). The organic layer was separated, washed with H<sub>2</sub>O (4 × 30 mL), dried over Na<sub>2</sub>SO<sub>4</sub> and concentrated *in vacuo* to give a yellow solid. Purification by FC (Et<sub>2</sub>O/pentane, 1:1) gave acetoxyenone **5** as light yellow oil (135 mg, 85 %). *R<sub>f</sub>* 0.75 (Et<sub>2</sub>O/pentane, 9:1);  $\delta_{\text{H}}$  (CDCl<sub>3</sub>, 300 MHz) 1.41 (6H, s, 2 × CH<sub>3</sub>), 2.15 (3H, s, OCH<sub>3</sub>), 4.47 (1H, d, *J* 5.5, H-5), 4.54 (1H, dd, *J* 5.5, 3.5, H-4), 5.61 (1H, m, H-4), 6.21 (1H, d, *J* 10.5, H-2), 6.81 (1H, dd, *J* 10.5, 3.5, H-3); *m/z* (CI<sup>+</sup>) 227 (MH<sup>+</sup>, 35%), 244 (MNH<sub>4</sub><sup>+</sup>, 100%).

**(4*R*,5*S*,6*R*)-4-*O*-(*tert*-Butyldimethylsilyl) -5,6-di-*O*-isopropylidencyclohex-2-ene-1-one (6)**<sup>12</sup>

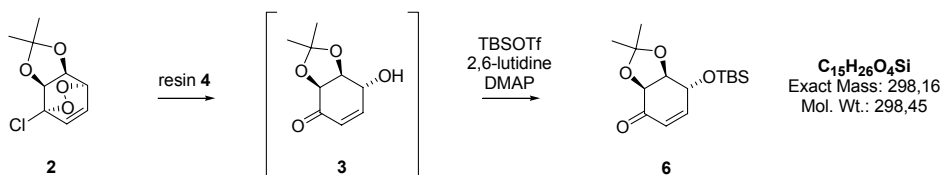

To a suspension of resin **4** (1.10 g, 1.10 mmol) in  $\text{CH}_2\text{Cl}_2$  (15 mL) at 0 °C was added a solution of 1-chloro-4-methyl-3,5,8,9-tetraoxa-tricyclo[5.2.2.0]undec-10-ene **2**<sup>11</sup> (0.16 g, 0.73 mmol) in  $\text{CH}_2\text{Cl}_2$  (5 mL) *via* a cannula. After stirring for 30 min the resin was filtered off and washed with  $\text{CH}_2\text{Cl}_2$  (3 × 20 mL). The filtrate was concentrated *in vacuo* to a volume of ~5 mL and a mixture of DMAP (12 mg, 0.07 mmol), 2,6-lutidine (109  $\mu\text{L}$ , 1.03 mmol) and TBSOTf (184  $\mu\text{L}$ , 0.81 mmol) in  $\text{CH}_2\text{Cl}_2$  (3 mL) was added at RT. After stirring for a further 20 min, the reaction mixture was quenched with  $\text{NaHCO}_3$  (sat. aq. 5 mL). The organic layer was separated, washed with  $\text{H}_2\text{O}$  (4 × 30 mL), dried over  $\text{Na}_2\text{SO}_4$  and concentrated *in vacuo* to give a yellow solid. Purification by FC (EtOAc/hexane, 3:7) gave silyl ether **6** as a viscous colourless oil, which solidified upon refrigeration (176 mg, 81 %).  $R_f$  0.7 (EtOAc/hexane, 2:1);  $\delta_{\text{H}}$  ( $\text{CDCl}_3$ , 300 MHz) 0.15 (3H, s,  $\text{SiCH}_3$ ), 0.18 (3H, s,  $\text{SiCH}_3$ ), 0.94 [9H, s,  $\text{Si}(\text{CH}_3)_3$ ], 1.40 (3H, s,  $\text{CH}_3$ ), 1.41 (3H, s,  $\text{CH}_3$ ), 4.47 (2H, m, H-5 and H-6), 4.56 (1H, m, H-4), 6.09 (1H, dd,  $J$  10.0, 1.0, H-2), 6.90 (1H, ddd,  $J$  10.0, 4.0, 1.0, H-3);  $m/z$  ( $\text{Cl}^+$ ) 299 ( $\text{MH}^+$ , 12%), 316 ( $\text{MNH}_4^+$ , 100%).

***cis*-2,2-Dimethyl-3a,4,7,7a-tetrahydrobenzo[1,3]dioxole-4,7-diol (**15**)**<sup>13</sup>

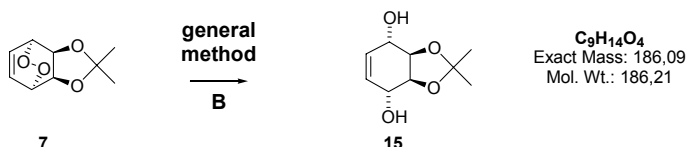

**General Method B:** To a suspension of resin **4** (0.814 g, 0.814 mmol) in  $\text{CH}_2\text{Cl}_2$  (15 mL) at 0 °C was added a solution of endoperoxide **7** (0.10 g, 0.54 mmol) in  $\text{CH}_2\text{Cl}_2$  (5 mL) *via* a cannula. The reaction mixture was then stirred at RT until all the endoperoxide had been consumed (by TLC, 2.5 h in this case) and then the resin was filtered off and washed with  $\text{CH}_2\text{Cl}_2$  (3 × 20 mL). The filtrate was concentrated *in vacuo* to give diol **15** as light brown needles (98 mg, 98 %).  $R_f$  0.35 (Et<sub>2</sub>O/pentane, 9:1);  $\delta_{\text{H}}$  ( $\text{CDCl}_3$ , 300 MHz) 1.37 (3H, s,  $\text{CH}_3$ ), 1.42 (3H, s,  $\text{CH}_3$ ), 2.79-2.98 (2H, br s, 2 × OH), 4.18 (4H, s, 2 ×  $\text{CHOH}$  and 2 ×  $\text{CHO}$ ), 5.81 (2H, s,  $\text{CH}=\text{CH}$ );  $m/z$  ( $\text{Cl}^+$ ) 187 ( $\text{MH}^+$ , 100%), 204 ( $\text{MNH}_4^+$ , 63%).

***cis*-1,4-Dihydroxycyclohex-2-ene (16)<sup>3</sup>**

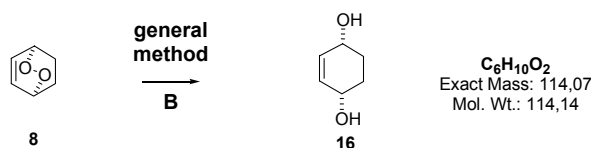

Using **general method B**, endoperoxide **8** (0.05 g, 0.446 mmol) and resin **4** (0.67 g, 0.67 mmol) after 96 h gave diol **16** as a white amorphous solid (51 mg, 99 %).  $R_f$  0.10 (heptane/Et<sub>2</sub>O, 7:3);  $\delta_H$  (CDCl<sub>3</sub>, 300 MHz) 1.88 (4H, br s, 2 × CH<sub>2</sub>), 3.31 (2H, br s, 2 × OH), 4.16 (2H, br s, 2 × CHOH), 5.87 (2H, br s, CH=CH);  $m/z$  (CI<sup>+</sup>) 132 (MNH<sub>4</sub><sup>+</sup>, 100%).

***cis*-Cyclohept-2-ene-1,4-diol (17)<sup>4</sup>**

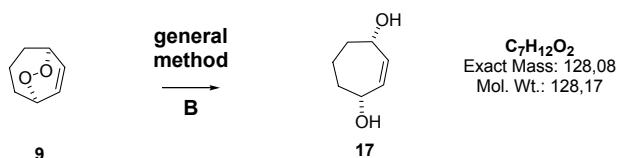

Using **general method B**, endoperoxide **9** (0.05 g, 0.39 mmol) and resin **4** (0.59 g, 0.59 mmol) after 70 h gave diol **17** as a white powder (43 mg, 85 %).  $R_f$  0.5 (Et<sub>2</sub>O);  $\delta_H$  (CDCl<sub>3</sub>, 300 MHz) 1.43-1.89 (4H, 2 × CH<sub>2</sub>), 2.02-2.15 (2H, CH<sub>2</sub>), 4.29 (2H, d,  $J$  9.0, 2 × CHOH), 5.76 (2H, s, CH=CH), 2 × OH (absent);  $m/z$  (CI<sup>+</sup>) 129 (MH<sup>+</sup>, 37%), 146 (MNH<sub>4</sub><sup>+</sup>, 98%).

***cis*-1,4-Diacetoxycyclohepta-2,5-diene (18)**

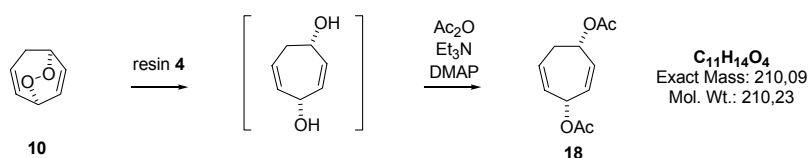

To a suspension of resin **4** (0.610 g, 0.610 mmol) in CH<sub>2</sub>Cl<sub>2</sub> (15 mL) at 0 °C was added a solution of endoperoxide **10** (0.05 g, 0.40 mmol) in CH<sub>2</sub>Cl<sub>2</sub> (5 mL) *via* a cannula. After stirring for 120 h the resin was filtered off and washed with CH<sub>2</sub>Cl<sub>2</sub> (3 × 30 mL). The filtrate was concentrated *in vacuo* to a volume of ~10 mL and a mixture of DMAP (5 mg, 0.04 mmol), Et<sub>3</sub>N (85 μL, 1.20 mmol) and Ac<sub>2</sub>O (49 μL, 1.04 mmol) in CH<sub>2</sub>Cl<sub>2</sub> (3 mL) was added at RT. After stirring for a further 20 min, the reaction mixture was quenched with NaHCO<sub>3</sub> (sat. aq., 5 mL). The organic layer was separated, washed with H<sub>2</sub>O (4 × 30 mL), dried over Na<sub>2</sub>SO<sub>4</sub> and concentrated *in vacuo* to give a brown oil.

Purification by FC (CH<sub>2</sub>Cl<sub>2</sub>, 2:1) gave diacetate **18** as light brown oil (66 mg, 77 %). *R<sub>f</sub>* 0.8 (petrol/EtOAc, 1:2); δ<sub>H</sub> (CDCl<sub>3</sub>, 400 MHz) 2.05 (3H, s, CH<sub>3</sub>), 2.09 (3H, s, CH<sub>3</sub>), 2.47 (2H, br s, CH<sub>2</sub>), 5.52-5.76 (5H, 2 × CH=CH and CHO), 6.14 (1H, br s, CHO); δ<sub>C</sub> (CDCl<sub>3</sub>, 100 MHz) 21.2 (q), 21.3 (q), 31.4 (t), 68.7 (*d*), 71.8 (*d*), 126.3 (*d*), 130.8 (*d*), 131.2 (*d*), 131.6 (*d*); *m/z* (CI<sup>+</sup>) 228 (MNH<sub>4</sub><sup>+</sup>, 92%). Found: *m/z* MNH<sub>4</sub><sup>+</sup> 228.12226, C<sub>11</sub>H<sub>18</sub>NO<sub>4</sub> requires 228.12223 (Δ = + 0.3 ppm).

***cis*-9,10-Dihydroanthracene-9,10-diol (**19**)**<sup>14</sup>

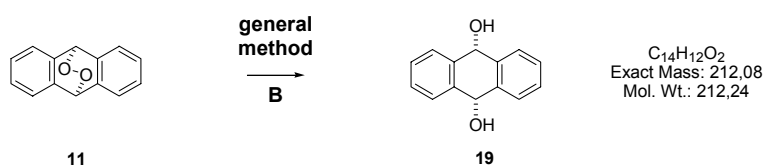

Using **general method B**, endoperoxide **11** (0.05 g, 0.238 mmol) and resin **4** (0.357 g, 0.357 mmol) after 3 h gave diol **19** as a white solid (50.5 mg, 85 %). Recrystallisation from hot toluene gave a fluffy white solid (45.7 mg, 77%). *R<sub>f</sub>* 0.3 (Et<sub>2</sub>O); δ<sub>H</sub> (*d*<sub>6</sub>-DMSO, 300 MHz) 5.38 (2H, br d, *J* 7.5, 2 × CHO), 7.21-7.35 (4H, ArCHs), 7.39-7.41 (4H, ArCHs); *m/z* (CI<sup>+</sup>) 213 (MH<sup>+</sup>, 43%) 230 (MNH<sub>4</sub><sup>+</sup>, 100%).

**(±)-*cis*-9-Methyl-9,10-dihydroanthracene-9,10-diol (**20**)**<sup>7</sup>

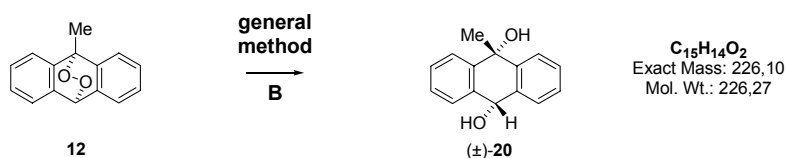

Using **general method B**, endoperoxide **12** (0.05 g, 0.222 mmol) and resin **4** (0.334 g, 0.334 mmol) after 5.5 h gave diol (±)-**20** as a white needles (50.2 mg, 99 %). *R<sub>f</sub>* 0.5 (Et<sub>2</sub>O); δ<sub>H</sub> (CDCl<sub>3</sub>, 270 MHz) 1.49 (3H, s, CH<sub>3</sub>), 2.26 (2H, s, 2 × OH), 5.46 (1H, d, *J* 9.0, CHOH), 7.33-7.40 (4H, ArCHs), 7.70-7.77 (4H, ArCHs); *m/z* (CI<sup>+</sup>) 209 (MH<sup>+</sup>-H<sub>2</sub>O, 100%), 226 (MNH<sub>4</sub><sup>+</sup>-H<sub>2</sub>O, 23%).

**References:**

- (1) Secen, H.; Gultekin, S.; Sutbeyaz, Y.; Balci, M. *Synth. Commun.* **1994**, *24*, 2103-2108.
- (2) Ramesh, K.; Wolfe, M. S.; Lee, Y.; Velde, D. V.; Borchardt, R. T. *J. Org. Chem.* **1992**, *57*, 5861-5868.
- (3) Kaneko, C.; Sugimoto, A.; Tanaka, S. *Synth. Comm.* **1974**, 876.



- (4) Pearson, A. J.; Lai, Y. S.; Lu, W. Y.; Pinkerton, A. A. *J. Org. Chem.* **1989**, *54*, 3882-3893.
- (5) Adam, W.; Balci, M. *J. Am. Chem. Soc.* **1979**, *101*, 7537-7541.
- (6) Zingg, S. P.; Sigman, M. E. *Photochem. Photobiol.* **1993**, *57*, 453-459.
- (7) Ried, W. *Angew. Chem.* **1964**, *23*, 933.
- (8) Zadok, E.; Rubinraut, S.; Frolow, F.; Mazur, Y. *J. Am. Chem. Soc.* **1985**, *107*, 2489-2494.
- (9) Greatrex, B. W.; Taylor, D. K. *J. Org. Chem.* **2005**, *70*, 470-476.
- (10) Oppolzer, W.; Spivey, A. C.; Bochet, C. G. *J. Am. Chem. Soc.* **1994**, *116*, 3139-3140.
- (11) Oppolzer, W., Spivey, A.C., Bochet, C.B. *J. Am. Chem. Soc.* **1994**, *116*, 3139-3140.
- (12) Hudlicky, T.; Fan, R. L.; Tsunoda, T.; Luna, H.; Andersen, C.; Price, J. D. *Isr. J. Chem.* **1991**, *31*, 229-238.
- (13) Sutbeyaz, Y.; Secen, H.; Balci, M. *J. Chem. Soc., Chem. Commun.* **1988**, 1330-1331.
- (14) Brown, H. C.; Krishnamurthy, S.; Yoon, N. M. *J. Org. Chem.* **1976**, *41*, 1778.
